# Supplementary material
Source: PubMed Central journal article supplement (PMC5118184)
Supplement: NIHMS819426-supplement-Supp_Table_S1.pdf [file NIHMS819426-supplement-Supp_Table_S1.pdf]

**Association of IL1B and IL6 Polymorphisms with Steatohepatitis and Parenchymal Damage in Caucasians with Nonalcoholic Fatty Liver Disease**

James E. Nelson#, Priya Handa#, Bradley Aouizerat, Laura Wilson, L. Akhila Vemulakonda, Matthew M. Yeh and Kris V. Kowdley\*; for the NASH Clinical Research Network

**SUPPLEMENTAL TABLE 1. Single nucleotide polymorphism primer and probe sequences**

| SNP ID            | Forward Primer<br>(Cat. #)                            | Reverse primer<br>(Cat. #)                            | Probe 1<br>(Cat. #)                                          | Probe 2<br>(Cat. #)                                           |
|-------------------|-------------------------------------------------------|-------------------------------------------------------|--------------------------------------------------------------|---------------------------------------------------------------|
| <b>rs16944</b>    | CCTCAGAGGCTCCTGCAATT<br>GACAG<br>(UVA10012-E1)        | AATAAATCATAAGGGTGTGGG<br>TCTCTACCTTG<br>(UVA10012-E1) | (MGB EDQ)-<br>AGCTCCCGAGGCA-<br>(FAM1)<br>(UVA10012-FAM1)    | (MGB EDQ)-<br>AGCTCCT*GAGGCAG-<br>(TET)<br>UVA10012-TET1      |
| <b>rs1143634</b>  | AATAAATCATAAGGTGCATC<br>GTGCACATAAGC<br>(UVA10013-L2) | AATAAATCATAACGAGGCCTG<br>CCCTTCTGAT<br>(UVA10013-E2)  | (MGB EDQ)-<br>CATGTGTCTCGAAGAAG-<br>(FAM)<br>(UVA10013-FAM1) | (MGB EDQ)-<br>CATGTGT*CAAAGAAG-<br>(TET)<br>(UVA10013-TET1)   |
| <b>rs1800795</b>  | AATAAATCATAAGTGGGGCT<br>GATTGGAAACCT<br>(UVA10015-L1) | CCTCAATGACGACCTAAGCTG<br>CACT<br>(UVA10015-E1)        | (MGB EDQ)-<br>AGCATCGCAAGAC-(FAM)<br>(UVA10015-FAM1)         | (MGB EDQ)-<br>TTAGCATGGCAAGA-(TET)<br>(UVA10015-TET1)         |
| <b>rs10499563</b> | AATAAATCATAAGAAGCCTG<br>GTCTGGCCTGT<br>(UVA10016-L2)  | CTGGTAAGGGCTGCTACCTGA<br>AAG<br>(UVA10016-E1)         | (MGB EDQ) -<br>ATAATAACTGT*GCT-<br>(FAM)<br>(UVA10016-FAM1)  | (MGB EDQ) -<br>TAATAAT*TGCTGT*TG-<br>(TET)<br>(UVA10016-TET1) |

\*denotes incorporation of modified base (Super A<sup>TM</sup>, Super T<sup>TM</sup>, Super G<sup>TM</sup>, or Super N<sup>TM</sup>) to the left
